# Supplementary material for: Multiplex CRISPR Mutagenesis of the Serine/Arginine-Rich (SR) Gene Family in Rice
Source: PubMed Central journal article supplement (PMC6723545; doi:10.3390/genes10080596), 2019-08-07
Supplement: genes-10-00596-s001.pdf [file genes-10-00596-s001.pdf]

## Supplementary material

# Multiplex CRISPR Mutagenesis of the Serine/Arginine-Rich (SR) Gene Family in Rice

Haroon Butt <sup>1</sup>, Agnieszka Piatek <sup>1</sup>, Lixin Li <sup>1</sup>, Anireddy S.N. Reddy <sup>2</sup> and Magdy M. Mahfouz <sup>1,\*</sup>

<sup>1</sup> Laboratory for Genome Engineering and Synthetic Biology, Division of Biological Sciences, King Abdullah University of Science and Technology, Thuwal 23955-6900, Saudi Arabia

<sup>2</sup> Program in Molecular Plant Biology, Program in Cell and Molecular Biology, Department of Biology, Colorado State University, Fort Collins, CO 80523-1062, USA

\* Correspondence: magdy.mahfouz@kaust.edu.sa

**Keywords:** splicing; alternative splicing; SR proteins; genome engineering; multiplex targeting; CRISPR/Cas9

---

**Table S1.** Synthetic fragments used as sgRNAs for targeting single and multiple SR loci.

| Target Loci                 | 5'-Sequence-3'                                                                                                                                                                                                                                                                                                                                                                                                                                                                                                                                                                                                                                                                                                                                                                    |
|-----------------------------|-----------------------------------------------------------------------------------------------------------------------------------------------------------------------------------------------------------------------------------------------------------------------------------------------------------------------------------------------------------------------------------------------------------------------------------------------------------------------------------------------------------------------------------------------------------------------------------------------------------------------------------------------------------------------------------------------------------------------------------------------------------------------------------|
| <i>SR32</i>                 | AACAAAGCACCAGTGGTCTAGTGGTAGAATAGTACCCTGCCACGGTACAGACCCGGGTTTCGATTCCCAGGCTGGTGCAAAAGATCC<br>CTCCGAGGCCACC GTTTTAGAGCTAGAAAATAGCAAGTAAAAATAAGGCTAGTCCGTTATCAACTTGAAAAAGTGGCACCAGTGC<br>GGTGC TTTT TTTT                                                                                                                                                                                                                                                                                                                                                                                                                                                                                                                                                                              |
| <i>SR33a</i>                | AACAAAGCACCAGTGGTCTAGTGGTAGAATAGTACCCTGCCACGGTACAGACCCGGGTTTCGATTCCCAGGCTGGTGCAAAAAATTC<br>CTCCAAGGCCCTCC GTTTTAGAGCTAGAAAATAGCAAGTAAAAATAAGGCTAGTCCGTTATCAACTTGAAAAAGTGGCACCAGTGC<br>GGTGC TTTT TTTT                                                                                                                                                                                                                                                                                                                                                                                                                                                                                                                                                                             |
| <i>SR33</i>                 | AACAAAGCACCAGTGGTCTAGTGGTAGAATAGTACCCTGCCACGGTACAGACCCGGGTTTCGATTCCCAGGCTGGTGCAAGAACCT<br>CCCGGGCAGCATC GTTTTAGAGCTAGAAAATAGCAAGTAAAAATAAGGCTAGTCCGTTATCAACTTGAAAAAGTGGCACCAGTGC<br>GGTGC TTTT TTTT                                                                                                                                                                                                                                                                                                                                                                                                                                                                                                                                                                               |
| <i>SR40</i>                 | AACAAAGCACCAGTGGTCTAGTGGTAGAATAGTACCCTGCCACGGTACAGACCCGGGTTTCGATTCCCAGGCTGGTGCAATAAGG<br>ATATAGATCTTGC GTTTTAGAGCTAGAAAATAGCAAGTAAAAATAAGGCTAGTCCGTTATCAACTTGAAAAAGTGGCACCAGTGC<br>GGTGC TTTT TTTT                                                                                                                                                                                                                                                                                                                                                                                                                                                                                                                                                                                |
| <i>SR32/SR33a/SR33/SR40</i> | AACAAAGCACCAGTGGTCTAGTGGTAGAATAGTACCCTGCCACGGTACAGACCCGGGTTTCGATTCCCAGGCTGGTGCAAAAGATCC<br>CTCCGAGGCCACC GTTTTAGAGCTAGAAAATAGCAAGTAAAAATAAGGCTAGTCCGTTATCAACTTGAAAAAGTGGCACCAGTGC<br>GGTGC AACAAAGCACCAGTGGTCTAGTGGTAGAATAGTACCCTGCCACGGTACAGACCCGGGTTTCGATTCCCAGGCTGGTGCAAA<br>AATTCCTCCAAGGCCCTCC GTTTTAGAGCTAGAAAATAGCAAGTAAAAATAAGGCTAGTCCGTTATCAACTTGAAAAAGTGGCACC<br>AGTCCGGTGC AACAAAGCACCAGTGGTCTAGTGGTAGAATAGTACCCTGCCACGGTACAGACCCGGGTTTCGATTCCCAGGCTGGTGC<br>CAGGAACCTCCCGGGCAGCATC GTTTTAGAGCTAGAAAATAGCAAGTAAAAATAAGGCTAGTCCGTTATCAACTTGAAAAAGTGG<br>CACCAGTCCGGTGC AACAAAGCACCAGTGGTCTAGTGGTAGAATAGTACCCTGCCACGGTACAGACCCGGGTTTCGATTCCCAGG<br>TGGTGCAATAAGGATATAGATCTTGC GTTTTAGAGCTAGAAAATAGCAAGTAAAAATAAGGCTAGTCCGTTATCAACTTGAAAA<br>GTGGCACCAGTCCGGTGC TTTT TTTT |
| <i>RSZ21a</i>               | AACAAAGCACCAGTGGTCTAGTGGTAGAATAGTACCCTGCCACGGTACAGACCCGGGTTTCGATTCCCAGGCTGGTGCAAGTGCAGC<br>GCGCGGGAGCTCCG GTTTTAGAGCTAGAAAATAGCAAGTAAAAATAAGGCTAGTCCGTTATCAACTTGAAAAAGTGGCACCAGTGC<br>GGTGC TTTT TTTT                                                                                                                                                                                                                                                                                                                                                                                                                                                                                                                                                                             |
| <i>RSZ21</i>                | AACAAAGCACCAGTGGTCTAGTGGTAGAATAGTACCCTGCCACGGTACAGACCCGGGTTTCGATTCCCAGGCTGGTGCAAGGATCCC<br>CGAGTGACTCCG GTTTTAGAGCTAGAAAATAGCAAGTAAAAATAAGGCTAGTCCGTTATCAACTTGAAAAAGTGGCACCAGTGC<br>GGTGC TTTT TTTT                                                                                                                                                                                                                                                                                                                                                                                                                                                                                                                                                                               |
| <i>RSZ23</i>                | AACAAAGCACCAGTGGTCTAGTGGTAGAATAGTACCCTGCCACGGTACAGACCCGGGTTTCGATTCCCAGGCTGGTGCAAGACCTG<br>GATCCGCGGTGAG GTTTTAGAGCTAGAAAATAGCAAGTAAAAATAAGGCTAGTCCGTTATCAACTTGAAAAAGTGGCACCAGTGC<br>GGTGC TTTT TTTT                                                                                                                                                                                                                                                                                                                                                                                                                                                                                                                                                                               |
| <i>RSZ21a/RSZ21/RSZ23</i>   | AACAAAGCACCAGTGGTCTAGTGGTAGAATAGTACCCTGCCACGGTACAGACCCGGGTTTCGATTCCCAGGCTGGTGCAAGTGCAGC<br>GCGCGGGAGCTCCG GTTTTAGAGCTAGAAAATAGCAAGTAAAAATAAGGCTAGTCCGTTATCAACTTGAAAAAGTGGCACCAGTGC<br>GGTGC AACAAAGCACCAGTGGTCTAGTGGTAGAATAGTACCCTGCCACGGTACAGACCCGGGTTTCGATTCCCAGGCTGGTGCAG<br>ATCCCGAGTGACTTCCG GTTTTAGAGCTAGAAAATAGCAAGTAAAAATAAGGCTAGTCCGTTATCAACTTGAAAAAGTGGCACC<br>AGTCCGGTGC AACAAAGCACCAGTGGTCTAGTGGTAGAATAGTACCCTGCCACGGTACAGACCCGGGTTTCGATTCCCAGGCTGGTGC<br>CAGAACCTGGATCCGGCCGTGAG GTTTTAGAGCTAGAAAATAGCAAGTAAAAATAAGGCTAGTCCGTTATCAACTTGAAAAAGTGG<br>CACCAGTCCGGTGC TTTT TTTT                                                                                                                                                                                         |
| <i>SC25</i>                 | AACAAAGCACCAGTGGTCTAGTGGTAGAATAGTACCCTGCCACGGTACAGACCCGGGTTTCGATTCCCAGGCTGGTGCACTCCGGC<br>CGCTACGGCCAC GTTTTAGAGCTAGAAAATAGCAAGTAAAAATAAGGCTAGTCCGTTATCAACTTGAAAAAGTGGCACCAGTGC<br>GGTGC TTTT TTTT                                                                                                                                                                                                                                                                                                                                                                                                                                                                                                                                                                                |
| <i>SC32</i>                 | AACAAAGCACCAGTGGTCTAGTGGTAGAATAGTACCCTGCCACGGTACAGACCCGGGTTTCGATTCCCAGGCTGGTGCAATGTCCG<br>GCTTCGGCCGCTC GTTTTAGAGCTAGAAAATAGCAAGTAAAAATAAGGCTAGTCCGTTATCAACTTGAAAAAGTGGCACCAGTGC<br>GGTGC TTTT TTTT                                                                                                                                                                                                                                                                                                                                                                                                                                                                                                                                                                               |
| <i>SC34</i>                 | AACAAAGCACCAGTGGTCTAGTGGTAGAATAGTACCCTGCCACGGTACAGACCCGGGTTTCGATTCCCAGGCTGGTGCACTCCGGG<br>AGTCCGGCCGCG GTTTTAGAGCTAGAAAATAGCAAGTAAAAATAAGGCTAGTCCGTTATCAACTTGAAAAAGTGGCACCAGTGC<br>GGTGC TTTT TTTT                                                                                                                                                                                                                                                                                                                                                                                                                                                                                                                                                                                |
| <i>SC25/SC32/SC34</i>       | AACAAAGCACCAGTGGTCTAGTGGTAGAATAGTACCCTGCCACGGTACAGACCCGGGTTTCGATTCCCAGGCTGGTGCACTCCGGC<br>CGCTACGGCCAC GTTTTAGAGCTAGAAAATAGCAAGTAAAAATAAGGCTAGTCCGTTATCAACTTGAAAAAGTGGCACCAGTGC<br>GGTGC AACAAAGCACCAGTGGTCTAGTGGTAGAATAGTACCCTGCCACGGTACAGACCCGGGTTTCGATTCCCAGGCTGGTGCAT<br>GTCGGCTTCGGCCGCTC GTTTTAGAGCTAGAAAATAGCAAGTAAAAATAAGGCTAGTCCGTTATCAACTTGAAAAAGTGGCACC<br>AGTCCGGTGC AACAAAGCACCAGTGGTCTAGTGGTAGAATAGTACCCTGCCACGGTACAGACCCGGGTTTCGATTCCCAGGCTGGTGC<br>CACTCCGGAGTCCGGCCGCG GTTTTAGAGCTAGAAAATAGCAAGTAAAAATAAGGCTAGTCCGTTATCAACTTGAAAAAGTGG<br>CACCAGTCCGGTGC TTTT TTTT                                                                                                                                                                                               |
| <i>SCL25</i>                | AACAAAGCACCAGTGGTCTAGTGGTAGAATAGTACCCTGCCACGGTACAGACCCGGGTTTCGATTCCCAGGCTGGTGCAAGGACC<br>TTCGTCGGCCATT GTTTTAGAGCTAGAAAATAGCAAGTAAAAATAAGGCTAGTCCGTTATCAACTTGAAAAAGTGGCACCAGTGC<br>GGTGC TTTT TTTT                                                                                                                                                                                                                                                                                                                                                                                                                                                                                                                                                                                |
| <i>SCL26</i>                | AACAAAGCACCAGTGGTCTAGTGGTAGAATAGTACCCTGCCACGGTACAGACCCGGGTTTCGATTCCCAGGCTGGTGCAAGTCCCT<br>GTGGCCGCTATGG GTTTTAGAGCTAGAAAATAGCAAGTAAAAATAAGGCTAGTCCGTTATCAACTTGAAAAAGTGGCACCAGTGC<br>GGTGC TTTT TTTT                                                                                                                                                                                                                                                                                                                                                                                                                                                                                                                                                                               |
| <i>SCL28</i>                | AACAAAGCACCAGTGGTCTAGTGGTAGAATAGTACCCTGCCACGGTACAGACCCGGGTTTCGATTCCCAGGCTGGTGCAAGGCGTA<br>CCGGAGCCGAGC GTTTTAGAGCTAGAAAATAGCAAGTAAAAATAAGGCTAGTCCGTTATCAACTTGAAAAAGTGGCACCAGTGC<br>GGTGC TTTT TTTT                                                                                                                                                                                                                                                                                                                                                                                                                                                                                                                                                                                |
| <i>SCL25/SCL26/SCL28</i>    | AACAAAGCACCAGTGGTCTAGTGGTAGAATAGTACCCTGCCACGGTACAGACCCGGGTTTCGATTCCCAGGCTGGTGCAAGGACC<br>TTCGTCGGCCATT GTTTTAGAGCTAGAAAATAGCAAGTAAAAATAAGGCTAGTCCGTTATCAACTTGAAAAAGTGGCACCAGTGC<br>GGTGC AACAAAGCACCAGTGGTCTAGTGGTAGAATAGTACCCTGCCACGGTACAGACCCGGGTTTCGATTCCCAGGCTGGTGCAGT<br>CCTCGTGGCGCTATGG GTTTTAGAGCTAGAAAATAGCAAGTAAAAATAAGGCTAGTCCGTTATCAACTTGAAAAAGTGGCACC<br>AGTCCGGTGC AACAAAGCACCAGTGGTCTAGTGGTAGAATAGTACCCTGCCACGGTACAGACCCGGGTTTCGATTCCCAGGCTGGTGC<br>CACGGGTACCGGAGCCGAGC GTTTTAGAGCTAGAAAATAGCAAGTAAAAATAAGGCTAGTCCGTTATCAACTTGAAAAAGTGG<br>CACCAGTCCGGTGC TTTT TTTT                                                                                                                                                                                               |

| Target Locus                       | 5'-Sequence-3'                                                                                                                                                                                                                                                                                                                                                                                                                                                                                                                                                                 |
|------------------------------------|--------------------------------------------------------------------------------------------------------------------------------------------------------------------------------------------------------------------------------------------------------------------------------------------------------------------------------------------------------------------------------------------------------------------------------------------------------------------------------------------------------------------------------------------------------------------------------|
| <i>SCL30a/SCL30</i>                | AACAAAGCACCAGTGGTCTAGTGGTAGAATAGTACCCTGCCACGGTACAGACCCGGGTTTCGATTCCC GGCTGGTGCAAGTCCCC<br>CTAGGAGGGGATA GTTTAGAGCTAGAAATAGCAAGTAAAAATAAGGCTAGTCCGTTATCAACTTGAAAAAGTGGCACCGAGTC<br>GGTGC TTTT TTTT                                                                                                                                                                                                                                                                                                                                                                              |
| <i>SCL57</i>                       | AACAAAGCACCAGTGGTCTAGTGGTAGAATAGTACCCTGCCACGGTACAGACCCGGGTTTCGATTCCC GGCTGGTGCAAGGAGCCG<br>CAGCCCCAGCAAG GTTTAGAGCTAGAAATAGCAAGTAAAAATAAGGCTAGTCCGTTATCAACTTGAAAAAGTGGCACCGAGTC<br>GGTGC TTTT TTTT                                                                                                                                                                                                                                                                                                                                                                             |
| <i>SCL30a/SCL30/SCL57</i>          | AACAAAGCACCAGTGGTCTAGTGGTAGAATAGTACCCTGCCACGGTACAGACCCGGGTTTCGATTCCC GGCTGGTGCAAGTCCCC<br>CTAGGAGGGGATA GTTTAGAGCTAGAAATAGCAAGTAAAAATAAGGCTAGTCCGTTATCAACTTGAAAAAGTGGCACCGAGTC<br>GGTGC AACAAAGCACCAGTGGTCTAGTGGTAGAATAGTACCCTGCCACGGTACAGACCCGGGTTTCGATTCCC GGCTGGTGCAAG<br>AGCCGACGCCACAGAG GTTTAGAGCTAGAAATAGCAAGTAAAAATAAGGCTAGTCCGTTATCAACTTGAAAAAGTGGCACCG<br>GAGTCGGTGC TTTT TTTT                                                                                                                                                                                       |
| <i>RS2Z36/RS2Z38</i>               | AACAAAGCACCAGTGGTCTAGTGGTAGAATAGTACCCTGCCACGGTACAGACCCGGGTTTCGATTCCC GGCTGGTGCAAGT TTTAA<br>CTGTGGGATTGA GTTTAGAGCTAGAAATAGCAAGTAAAAATAAGGCTAGTCCGTTATCAACTTGAAAAAGTGGCACCGAGTC<br>GTGC TTTT TTTT                                                                                                                                                                                                                                                                                                                                                                              |
| <i>RS2Z37</i>                      | AACAAAGCACCAGTGGTCTAGTGGTAGAATAGTACCCTGCCACGGTACAGACCCGGGTTTCGATTCCC GGCTGGTGCAATTCCTCGC<br>GCACCCGGACCC GTTTAGAGCTAGAAATAGCAAGTAAAAATAAGGCTAGTCCGTTATCAACTTGAAAAAGTGGCACCGAGTC<br>GTGC TTTT TTTT                                                                                                                                                                                                                                                                                                                                                                              |
| <i>RS2Z39</i>                      | AACAAAGCACCAGTGGTCTAGTGGTAGAATAGTACCCTGCCACGGTACAGACCCGGGTTTCGATTCCC GGCTGGTGCAACCCGGGA<br>TGCAATGATGCG GTTTAGAGCTAGAAATAGCAAGTAAAAATAAGGCTAGTCCGTTATCAACTTGAAAAAGTGGCACCGAGTC<br>GGTGC TTTT TTTT                                                                                                                                                                                                                                                                                                                                                                              |
| <i>RS2Z36/RS2Z37/RS2Z38/RS2Z39</i> | AACAAAGCACCAGTGGTCTAGTGGTAGAATAGTACCCTGCCACGGTACAGACCCGGGTTTCGATTCCC GGCTGGTGCAAGT TTTAA<br>CTGTGGGATTGA GTTTAGAGCTAGAAATAGCAAGTAAAAATAAGGCTAGTCCGTTATCAACTTGAAAAAGTGGCACCGAGTC<br>GTGC AACAAAGCACCAGTGGTCTAGTGGTAGAATAGTACCCTGCCACGGTACAGACCCGGGTTTCGATTCCC GGCTGGTGCAATTC<br>TCGCGCACCCGGACCC GTTTAGAGCTAGAAATAGCAAGTAAAAATAAGGCTAGTCCGTTATCAACTTGAAAAAGTGGCACCGA<br>GTCCGTGC AACAAAGCACCAGTGGTCTAGTGGTAGAATAGTACCCTGCCACGGTACAGACCCGGGTTTCGATTCCC GGCTGGTG<br>ACCCGGGATGCAATGATGCG GTTTAGAGCTAGAAATAGCAAGTAAAAATAAGGCTAGTCCGTTATCAACTTGAAAAAGTGG<br>ACCGAGTCGGTGC TTTT TTTT |
| <i>RS29</i>                        | AACAAAGCACCAGTGGTCTAGTGGTAGAATAGTACCCTGCCACGGTACAGACCCGGGTTTCGATTCCC GGCTGGTGCAAGTATCCT<br>TTTGCCCTGGG GTTTAGAGCTAGAAATAGCAAGTAAAAATAAGGCTAGTCCGTTATCAACTTGAAAAAGTGGCACCGAGTC<br>TGC TTTT TTTT                                                                                                                                                                                                                                                                                                                                                                                 |
| <i>RS33</i>                        | AACAAAGCACCAGTGGTCTAGTGGTAGAATAGTACCCTGCCACGGTACAGACCCGGGTTTCGATTCCC GGCTGGTGCAAGAGCCGC<br>TCTTCAGCAAAATAGT TTTAGAGCTAGAAATAGCAAGTAAAAATAAGGCTAGTCCGTTATCAACTTGAAAAAGTGGCACCGAGTC<br>GTGC TTTT TTTT                                                                                                                                                                                                                                                                                                                                                                            |
| <i>RS29/RS33</i>                   | AACAAAGCACCAGTGGTCTAGTGGTAGAATAGTACCCTGCCACGGTACAGACCCGGGTTTCGATTCCC GGCTGGTGCAAGTATCCT<br>TTTGCCCTGGG GTTTAGAGCTAGAAATAGCAAGTAAAAATAAGGCTAGTCCGTTATCAACTTGAAAAAGTGGCACCGAGTC<br>TGC AACAAAGCACCAGTGGTCTAGTGGTAGAATAGTACCCTGCCACGGTACAGACCCGGGTTTCGATTCCC GGCTGGTGCAAGC<br>GCCTTTCAGCAAAATAGT TTTAGAGCTAGAAATAGCAAGTAAAAATAAGGCTAGTCCGTTATCAACTTGAAAAAGTGGCACCG<br>GTCCGTGC TTTT TTTT                                                                                                                                                                                          |
| U3 promoter                        | GACCATGATTACGCCAAGCTTAAGGAATCTTTAAACATACGAACAGATCACTTAAAGTTCTTCTGAAGCAACTTAAAG<br>TTATCAGGCATGCATGGATCTTGAGGAATCAGATGTGCAGTCAGGGACCATAGCACAAAGACAGGCCTCTTACTG<br>GTGCTACCAGCAAATGCTGGAAGCCGGGAACACTGGGTACGTTGGAACCACGTGATGGAAGAAAGTAAAGTAAACT<br>GTAGGAGAAAAGCATTTCTAGTGGCCATGAAGCCTTTCAGGACATGATTGCGATGAGGCGGCCATTACGCA<br>ATTGACGACAACAAAGACTAGTATTAGTACCACCTCGGCTATCCACATAGATCAAAGCTGATTTAAAGAGTTGTG<br>CAGATGATCCGTGGCA                                                                                                                                                    |

pre-tRNA: yellow background gRNA spacer: gray background Scaffold RNA: green background polIII terminator: red background

**Table S2:** List of oligos used for genotyping

| Oligo Name | 5'-Sequence-3'         |
|------------|------------------------|
| SR32_F     | GGGAAATAAGTAAGGCATGGC  |
| SR32_R     | GTAACCAGAACTGTGTGAAGTG |
| SR33a_F    | CACTTGGAGAGATTCCACCAG  |
| SR33a_R    | CACCTCGCTACCTCCTATTC   |
| SR33_F     | GTGGTCCAGTTTGGGGTTCAG  |
| SR33_R     | GTAGCTGCTAGAAGCATAACAG |
| SR40_F     | GTACTAAAGGATGGACCACTTG |
| SR40_R     | GAATAGTTAGGTACCATGCG   |
| RSZ21a_F   | CTCTCGCTCCCCCTCTTAC    |
| RSZ21a_R   | GCCTGGATGCCATAGCTGGG   |
| RSZ21_F    | CAGCTTCAGATTTCTGACACC  |
| RSZ21_R    | CTTATAGTACAAGGGGTACC   |
| RSZ23_F    | GTACTCTCCAGATCCCCCGC   |
| RSZ23_R    | CCCAATCCCACCAGTAGAAC   |
| SC25_F     | GCCGCGTCATCTTCTCTTC    |
| SC25_R     | GAACGCGAACCCTCTCGAATC  |
| SC32_F     | GTGGCCACCCTCACCTAC     |
| SC32_R     | CAGCCGACCTAATCAGCTCCC  |
| SC34_F     | CTCCACTGCACACACTCGCTG  |
| SC34_R     | GAATCCCCTCGAGTCCCCAGTC |
| SCL25_F    | CTTAAGCCGGTTATAGCGGCC  |
| SCL25_R    | CCCTTCTCTTCAACAGACTTG  |
| SCL26_F    | GCTTGTTTTATTCCCTACCAG  |
| SCL26_R    | CCTTACAGTTACGAACTTCTG  |
| SCL28_F    | ACCTCTCCTCGCCCAAGCC    |
| SCL28_R    | GTAAGCCCTAGATCAAATGGGC |
| SCL30a_F   | GTACTTGAAGTTACCTATGGG  |
| SCL30a_R   | GGAACTCTAAGATCCTCCGC   |
| SCL30_F    | GTTGGCCCAACATATTTTCTG  |
| SCL30_R    | CTGCATAACATCAGAACAGC   |
| SCL57_F    | CTGCCTAGCAAGTAGAATACC  |
| SCL57_R    | CCAGACATGACAGAAGTTAGAC |
| RS2Z36_F   | CCTTGATGGCAGGGATGTTG   |
| RS2Z36_R   | GACCGGCTGATATAAAGAATG  |
| RS2Z37_F   | CCCTAGCTTCTCTGTAGATC   |
| RS2Z37_R   | CAGCATGCTGCTGGCCTAGAC  |
| RS2Z38_F   | GGGATGTTGATGGAAGCCGC   |
| RS2Z38_R   | CTGGACCTAGATCGGCTGATAG |
| RS2Z39_F   | CACAGACTAGTGGATGTTCCC  |
| RS2Z39_R   | CCCTCTCTCCACAGCCATAG   |
| RS29_F     | GCAGGTGCAGTACTCTTCTG   |
| RS29_R     | GTGGCCTCTTCTGTGTTTC    |
| RS33_F     | CCTAGCATTGGCTATGGTGG   |
| RS33_R     | CAAATGGAGTACCACTCGC    |

**Table S3:** Summary for genotyping of SR mutants

| Target gene(s)                     | No. of plants genotyped | No. of plants mutated                               |
|------------------------------------|-------------------------|-----------------------------------------------------|
| <i>SR32</i>                        | 20                      | 1                                                   |
| <i>SR33a</i>                       | 5                       | 3                                                   |
| <i>SR33</i>                        | 5                       | 4                                                   |
| <i>SR40</i>                        | 5                       | 3                                                   |
| <i>SR32/SR33a/SR33/SR40</i>        | 10                      | None of the plant is homozygous mutant for all loci |
| <i>RSZ21a</i>                      | 5                       | 1                                                   |
| <i>RSZ21</i>                       | 5                       | 4                                                   |
| <i>RSZ23</i>                       | 5                       | 2                                                   |
| <i>RSZ21a/RSZ21/RSZ23</i>          | 10                      | None of the plant is homozygous mutant for all loci |
| <i>SC25</i>                        | 5                       | 4                                                   |
| <i>SC32</i>                        | 5                       | 5                                                   |
| <i>SC34</i>                        | 5                       | 3                                                   |
| <i>SC25/SC32/SC34</i>              | 10                      | None of the plant is homozygous mutant for all loci |
| <i>SCL25</i>                       | 8                       | 4                                                   |
| <i>SCL26</i>                       | 5                       | 4                                                   |
| <i>SCL28</i>                       | 4                       | 1                                                   |
| <i>SCL25/SCL26/SCL28</i>           | 10                      | None of the plant is homozygous mutant for all loci |
| <i>SCL30a/SCL30</i>                | 5                       | None of the plant is homozygous mutant for all loci |
| <i>SCL57</i>                       | 5                       | 5                                                   |
| <i>SCL30a/SCL30/SCL57</i>          | 5                       | None of the plant is homozygous mutant for all loci |
| <i>RS2Z36/RS2Z38</i>               | 5                       | 1 double mutant                                     |
| <i>RS2Z37</i>                      | 5                       | 5                                                   |
| <i>RS2Z39</i>                      | 5                       | 5                                                   |
| <i>RS2Z36/RS2Z37/RS2Z38/RS2Z39</i> | 10                      | None of the plant is homozygous mutant for all loci |
| <i>RS29</i>                        | 5                       | 2                                                   |
| <i>RS33</i>                        | 5                       | 3                                                   |
| <i>RS29/RS33</i>                   | 10                      | 1 double mutant                                     |
